# Supplementary material
Source: PubMed Central journal article supplement (PMC5499229)
Supplement: NIHMS849195-supplement-Supplement_docs.pdf [file NIHMS849195-supplement-Supplement_docs.pdf]

## Supplementary Online Content

Lu-Yao GL, Albertsen PC, Moore DF, et al. Fifteen-year survival outcomes following primary androgen-deprivation therapy for localized prostate cancer. *JAMA Intern Med*. Published online July 14, 2014.  
doi:10.1001/jamainternmed.2014.3028.

**eTable 1.** Risk of mortality according to cancer risk and treatment for the Cox multivariate and instrumental variable

**eTable 2.** Characteristics of men with localized prostate cancer in high-use and low-use primary ADT health service areas

**eFigure** Creation of study population

This supplementary material has been provided by the authors to give readers additional information about their work.

**eTable 1. Risk of Mortality According to Cancer Risk and Treatment for the Cox Multivariate and Instrumental Variable**

| Cancer Grade                                              | Primary ADT            | Conservative Management |                        |                 | Unadjusted HR<br>(95% CI) | Adjusted HR<br>(95% CI) |
|-----------------------------------------------------------|------------------------|-------------------------|------------------------|-----------------|---------------------------|-------------------------|
|                                                           | Events/<br>Person-Year | Rate<br>Per 100         | Events/<br>Person-Year | Rate<br>Per 100 |                           |                         |
| <b>Conventional Cox Multivariate Results<sup>a</sup></b>  |                        |                         |                        |                 |                           |                         |
| <b>Prostate cancer-specific mortality</b>                 |                        |                         |                        |                 |                           |                         |
| Moderately Differentiated                                 | 995/67316              | 1.5                     | 1230/145443            | 0.8             | 1.79(1.65-1.95)           | 1.65(1.52-1.8)          |
| Poorly Differentiated                                     | 1777/46572             | 3.8                     | 993/36199              | 2.7             | 1.39(1.28-1.5)            | 1.37(1.27-1.49)         |
| All localized                                             | 2837/119902            | 2.4                     | 2438/219027            | 1.1             | 2.21(2.09-2.33)           | 1.53(1.45-1.63)         |
| <b>Overall mortality</b>                                  |                        |                         |                        |                 |                           |                         |
| Moderately Differentiated                                 | 8037/76992             | 10.4                    | 14182/173536           | 8.2             | 1.29(1.26-1.33)           | 1.20(1.16-1.23)         |
| Poorly Differentiated                                     | 7868/56305             | 14                      | 5233/45975             | 11.4            | 1.24(1.19-1.28)           | 1.16(1.12-1.21)         |
| All localized                                             | 16589/139720           | 11.9                    | 23212/259650           | 8.9             | 1.39(1.36-1.41)           | 1.19(1.17-1.22)         |
| <b>Instrumental Variable Analysis Results<sup>b</sup></b> |                        |                         |                        |                 |                           |                         |
| <b>Prostate cancer-specific mortality</b>                 |                        |                         |                        |                 |                           |                         |
| Moderately Differentiated                                 | 1189/114000            | 1                       | 1036/98759             | 1               | 1.06(0.90-1.25)           | 0.99(0.86-1.16)         |
| Poorly Differentiated                                     | 1440/41440             | 3.5                     | 1330/41332             | 3.2             | 1.07(0.92-1.24)           | 1.04(0.91-1.19)         |
| All localized                                             | 2608/172081            | 1.5                     | 2667/166848            | 1.6             | 1.01(0.90-1.14)           | 0.98(0.88-1.09)         |
| <b>Overall mortality</b>                                  |                        |                         |                        |                 |                           |                         |
| Moderately Differentiated                                 | 12153/133188           | 9.1                     | 10066/117340           | 8.6             | 1.07(1.10-1.15)           | 1.01(0.96-1.07)         |
| Poorly Differentiated                                     | 6693/51084             | 13.1                    | 6408/51196             | 12.5            | 1.06(0.98-1.14)           | 1.04(0.98-1.10)         |
| All localized                                             | 20037/204810           | 9.8                     | 19764/194560           | 10.2            | 1.05(1.00-1.10)           | 1.02(0.98-1.07)         |

Abbreviation: ADT, primary androgen deprivation therapy; CI, confidence interval; HR, hazard ratio.

<sup>a</sup> Covariates included: age, race, comorbidity status, cancer stage, zip code income quartiles, zip code education quartiles, urban area, marital status, year of diagnosis, SEER (Surveillance, Epidemiology, and End Results) region, state buy-in status and cancer grade (all patients only). SEER region was not included in the instrumental variable analysis.

<sup>b</sup> High- and low-use areas corresponded to the above median and below median of Primary ADT utilization.

**eTable 2. Characteristics of Men With Localized Prostate Cancer in High-Use and Low-Use Primary ADT Health Service Areas <sup>a</sup>**

| Characteristic                            | Moderately Differentiated |                        | Poorly Differentiated  |                        | All Localized          |                        |
|-------------------------------------------|---------------------------|------------------------|------------------------|------------------------|------------------------|------------------------|
|                                           | High<br>N=20779           | Low<br>N=18527         | High<br>N=10825        | Low<br>N=10724         | High<br>N=34601        | Low<br>N=32116         |
| Primary ADT within 180d, No (%)           | 7755(37.3%)               | 4533(24.5%)            | 6648(61.4%)            | 5325(49.7%)            | 15046(43.5%)           | 10079(31.4%)           |
| Primary ADT within 18mo, No (%)           | 9329(44.9%)               | 5803(31.3%)            | 7777(71.8%)            | 6404(59.7%)            | 17948(51.9%)           | 12558(39.1%)           |
| Duration of Primary ADT use, mean(SD),mo  | 54(44)                    | 50(43)                 | 43(33)                 | 41(34)                 | 50(40)                 | 46(41)                 |
| Age at diagnosis, median (IQR), y         | 77(73,81)                 | 77(72,81)              | 80(75,84)              | 79(74,84)              | 78(73,82)              | 77(73,82)              |
| Zip code-level income, median(IQR), US \$ | 45718<br>(34740,60950)    | 45924<br>(35720,58653) | 42667<br>(33653,58154) | 44999<br>(33680,56912) | 44933<br>(34722,60646) | 45057<br>(34655,56952) |
| Charlson Score, %                         |                           |                        |                        |                        |                        |                        |
| 0                                         | 13274(63.9%)              | 12890(69.6%)           | 6807(62.9%)            | 6715(62.6%)            | 22116(63.9%)           | 21508(67.0%)           |
| 1                                         | 4568(22.0%)               | 3600(19.4%)            | 2361(21.8%)            | 2361(22.0%)            | 7500(21.7%)            | 6580(20.5%)            |
| 2+                                        | 2937(14.1%)               | 2037(11.0%)            | 1657(15.3%)            | 1648(15.4%)            | 4985(14.4%)            | 4028(12.5%)            |
| Clinical stage T1, No. (%)                | 9643(46.4%)               | 8843(47.7%)            | 4488(41.5%)            | 4010(37.4%)            | 16534(47.8%)           | 14068(43.8%)           |
| PSA, mean                                 | 9.5(11.2)                 | 9.5(11.9)              | 20.2(24.2)             | 17.7(21.4)             | 14.5(19.0)             | 13.7(18.1)             |
| Gleason Score, %                          |                           |                        |                        |                        |                        |                        |
| 2-6                                       | 6373(30.7%)               | 6729(36.3%)            | NA                     | NA                     | 7414(21.4%)            | 6061(18.9%)            |
| 7                                         | NA                        | NA                     | 3871(35.8%)            | 4045(37.7%)            | 4162(12.0%)            | 3754(11.7%)            |
| 8+                                        | NA                        | NA                     | 2252(20.8%)            | 2069(19.3%)            | 2358(6.8%)             | 1963(6.1%)             |

Abbreviations: ADT, primary androgen deprivation therapy; IQR, interquartile range; SD, stand deviation; PSA, prostate-specific antigen.

<sup>a</sup>See Table 1 for explanations of Charlson score and clinical stage tumor (T1). High- and low-use areas corresponded to the above median and below median of Primary ADT utilization.

## eFigure 1. Creation of Study Population

Total observations (672,634)

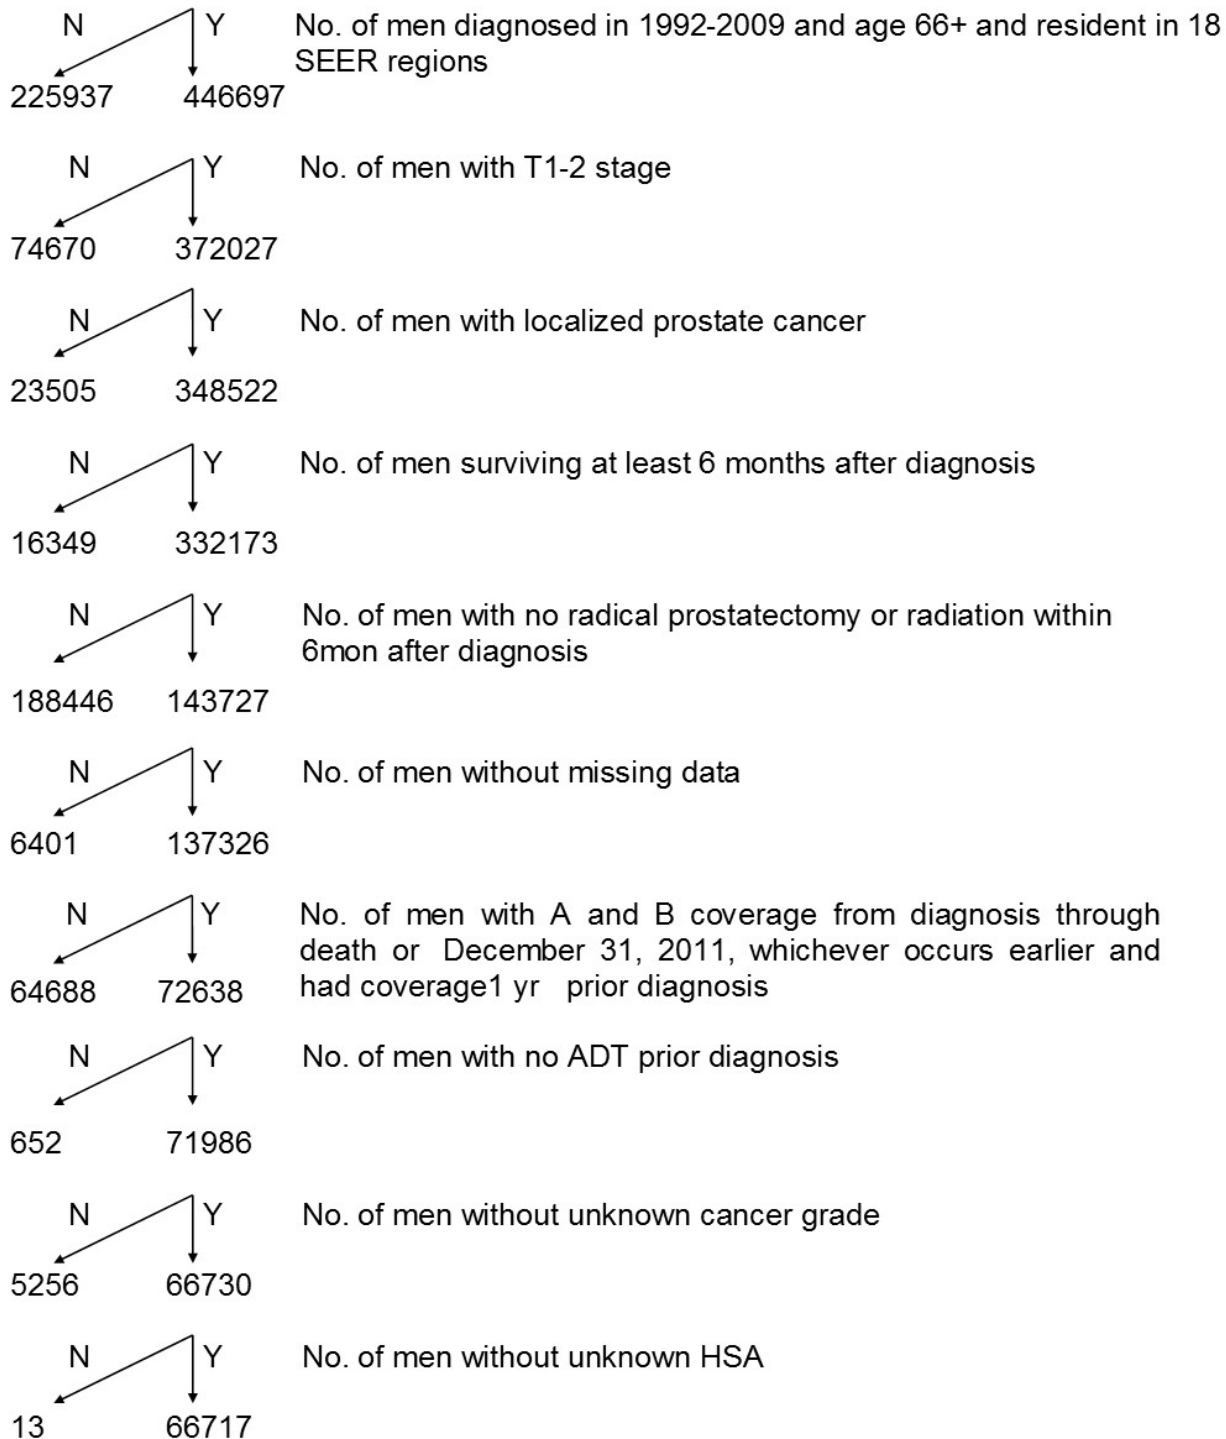

© 2014 American Medical Association. All rights reserved.
